**Psychiatric Services** (ISSN 1075-2730; online version, 1557-9700) is published monthly by the American Psychiatric Association, editorial and executive office, 1000 Wilson Blvd., Suite 1825, Arlington, VA 22209-3901. Copyright © 2016 by the American Psychiatric Association. Printed in U.S.A. Periodicals postage paid at Arlington, VA, and at additional mailing offices. POSTMASTER: Send address changes to **Psychiatric Services, 1000 Wilson Blvd., Suite 1825, Arlington, VA 22209-3901.**

## UNMATCHED GROWTH OPPORTUNITIES

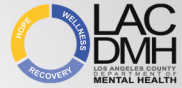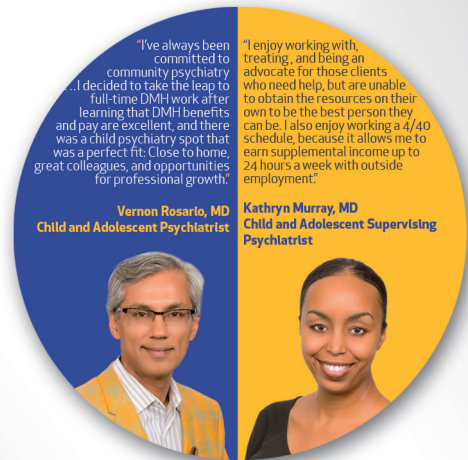

The Los Angeles County Department of Mental Health has immediate openings with Jail Mental Health Services, Juvenile Justice Correctional Facilities, Antelope Valley, and directly operated programs. This is your chance to join the leading mental health agency in the nation and work in a safe, diverse, and challenging environment. Our entire department is filled with opportunities for professional development and growth, and is expanding exponentially with 27 new full-time psychiatrist positions. We offer competitive salaries with potential bonuses up to \$30,000\* a year, depending on qualifications and placement, plus up to 24 hours a week is allowed for outside employment.

\*Based on CEO approval at step 15 of the mental health psychiatrist salary schedule.

[www.psychiatristjobs.la](http://www.psychiatristjobs.la)

## There's So Much More to PSYCHIATRIC SERVICES Than Meets the Page!

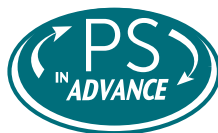

### Psychiatric Services in Advance

#### Latest research reports!

##### Factors Influencing Veterans' Access to PSH

Among nearly 10,000 veterans in VA permanent supported housing (PSH) program, 85% accessed housing. The odds of becoming housed were higher for veterans who received outpatient care after program entry.

##### People With Mental Disorders and the Police: A Literature Review

Data from 13 studies indicated that one in 100 police dispatches and encounters involve people with mental disorders. Data from 21 studies indicated that one in four people with mental disorders have a history of arrest

#### Revisit the field's rich history!

##### 50 Years Ago in Psychiatric Services

- Kenya's Only Mental Hospital
- Our Expectations Influence Patients
- Long-Term Patients Learn Living Skills

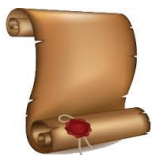

AMERICAN  
PSYCHIATRIC  
ASSOCIATION  
PUBLISHING

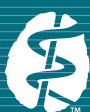

[ps.psychiatryonline.org](http://ps.psychiatryonline.org)

[www.appi.org](http://www.appi.org) • 1-800-368-5777 • Fax: 703-907-1091 • Email: [appi@psych.org](mailto:appi@psych.org)

Priority Code AH1520

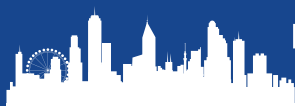

AMERICAN  
**PSYCHIATRIC**  
ASSOCIATION

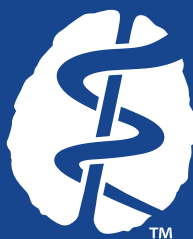

# ANNUAL MEETING

May 14-18, 2016 • Atlanta

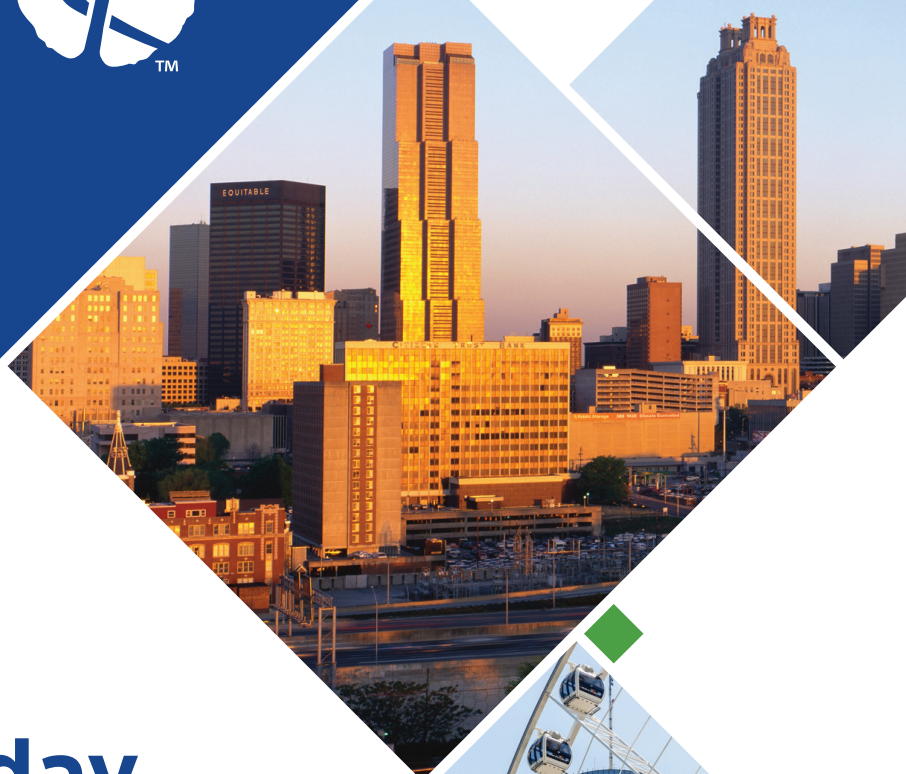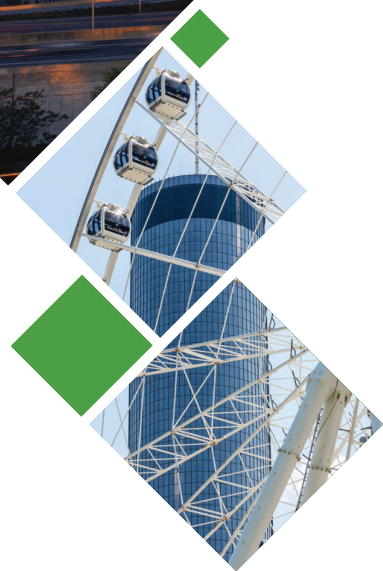

## Register Today

[psychiatry.org/annualmeeting](http://psychiatry.org/annualmeeting)

- Discover cutting-edge science and new therapies.
- Learn from renowned leaders in psychiatry and health policy.
- Connect with your peers and expand your professional network.
- Earn your annual licensure CME credit at one meeting.
- Explore the Exhibit Hall, APA Publishing Bookstore and Publishers' Book Fair.

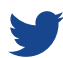

Join the conversation: **#APAAM2016**
