# Psychiatric Services

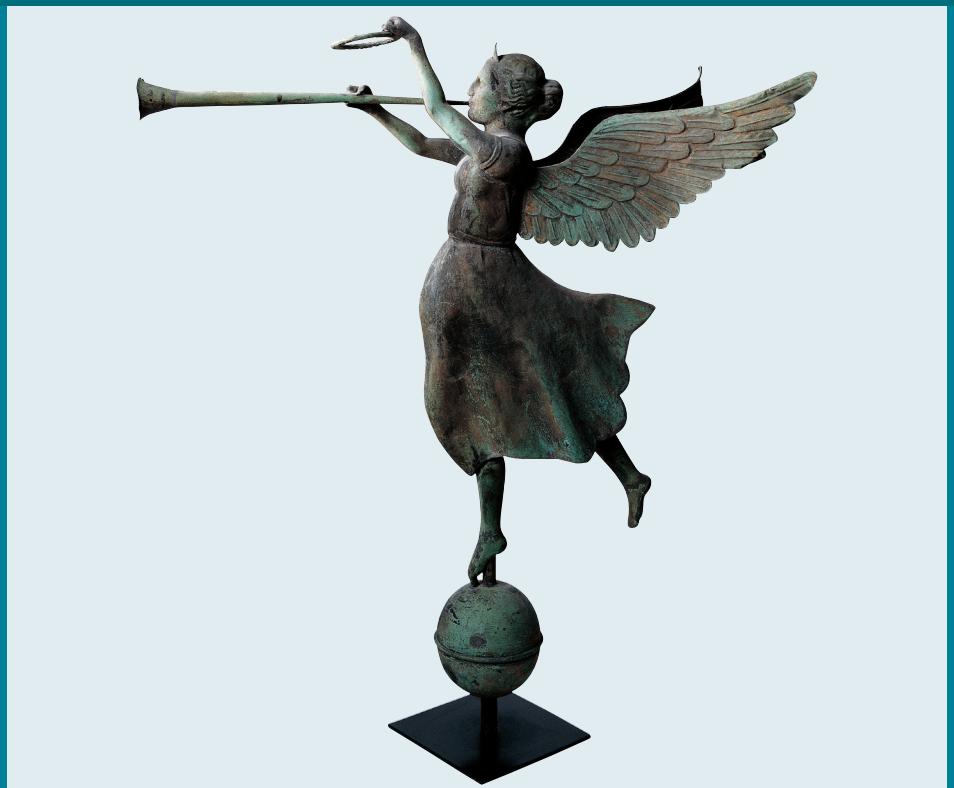

Impact of mental health courts on criminal recidivism: two new studies

Media “framing” of opioid analgesic abuse: criminal activity or treatable condition?

Quality of medication treatment: comparison of the VA and the private sector

Two essential tasks for successful implementation of the collaborative care model
